# Supplementary material for: Vertical assembly of few-layer graphene decorated with iron oxide nanoparticles on gold surfaces
Source: Royal Society of Chemistry journal article supplement (doi:10.1039/c6ra15502b), 2016-01-01
Supplement: c6ra15502b1.pdf [file c6ra15502b1.pdf]

## Vertical assembly of few-layer graphene decorated with iron oxide nanoparticles on gold surfaces

Alejandro Rodríguez-Serradet,<sup>a</sup> Sibel Ciftci,<sup>b</sup> Annabel Mikosch,<sup>b</sup> Alexander J. C. Kuehne,<sup>b</sup> Celso P. de Melo<sup>c</sup> and Roberto Cao-Milán,<sup>\*a</sup>

<sup>a</sup> Laboratorio de Bioinorgánica, Facultad de Química Universidad de La Habana, La Habana, 10400, Cuba. E-mail:

[robertocao.cuba@gmail.com](mailto:robertocao.cuba@gmail.com), Fax: +53 78733502; Tel: +53 78792145

<sup>b</sup> DWI - Leibniz-Institut für Interaktive Materialien e.V. Forckenbeckstr. 50, D-52056 Aachen, Germany

<sup>c</sup> Departamento de Física, Universidade Federal de Pernambuco, 50.670-901 Recife PE Brazil

### ELECTRONIC SUPPORTING INFORMATION

#### Table of Content

1. Characterization of Sulf-FLG by TEM and FT-IR
2. Characterization of IONPs by TEM, FT-IR, DRX and magnetic susceptibility
3. Vertical assembly of Sulf-FLG@IONP-Dop on gold surface
4. SEM micrographs and EDX elemental analysis of Au-v- Sulf-FLG@IONP-Dop (measured after 1 month of assembled).
5. System employed for measuring the electrochemical properties of Au\_v\_Sulf-FLG@IONP-Dop.

#### ESI 1: Characterization of Sulf-FLG by TEM and FT-IR

FT-IR spectra

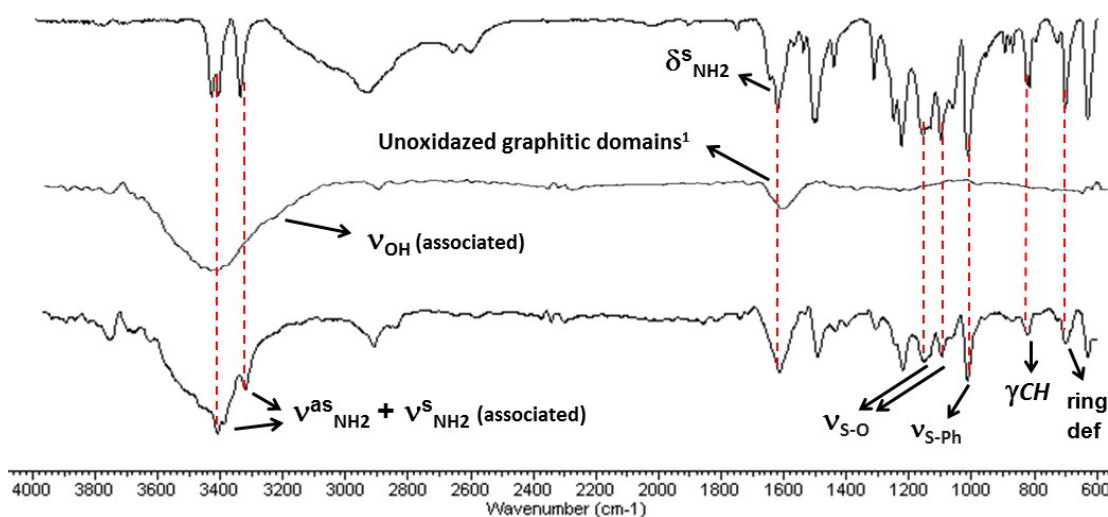

### Size distribution of Sulf-FLG

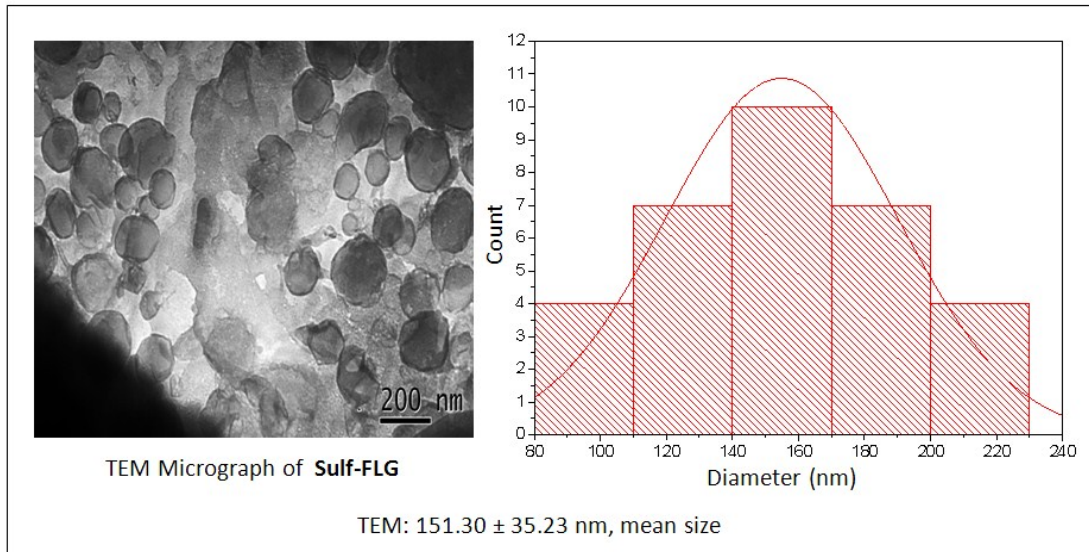

### ESI 2: Characterization of IONPs by TEM, FT-IR, DRX and magnetic susceptibility

#### Size distribution of IONPs

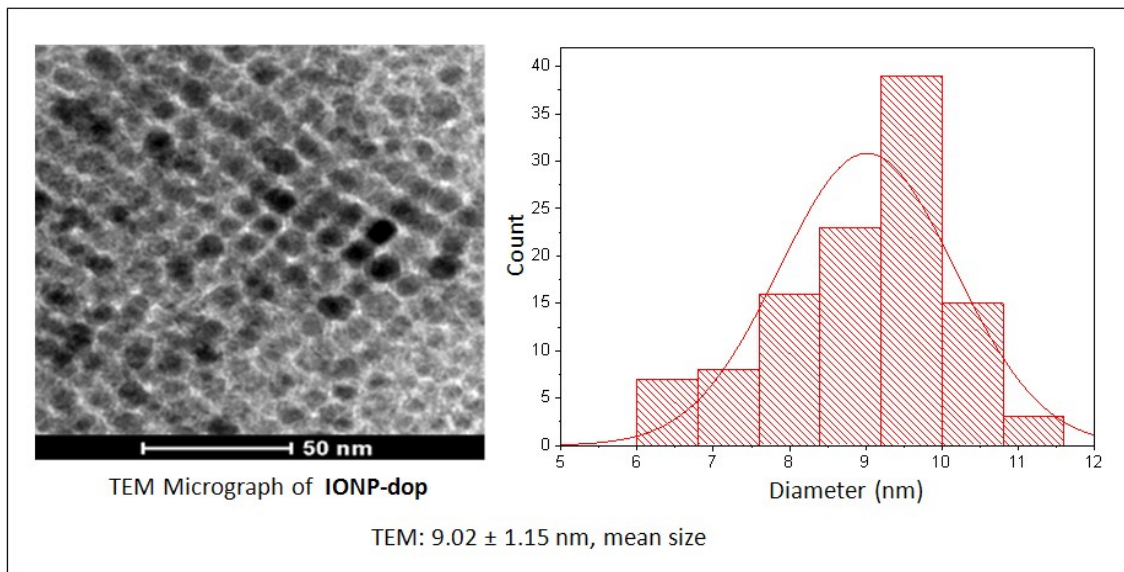

FT-IR spectra of IONP@oleylamine, IONP@Dop and dopamine hydrochloride

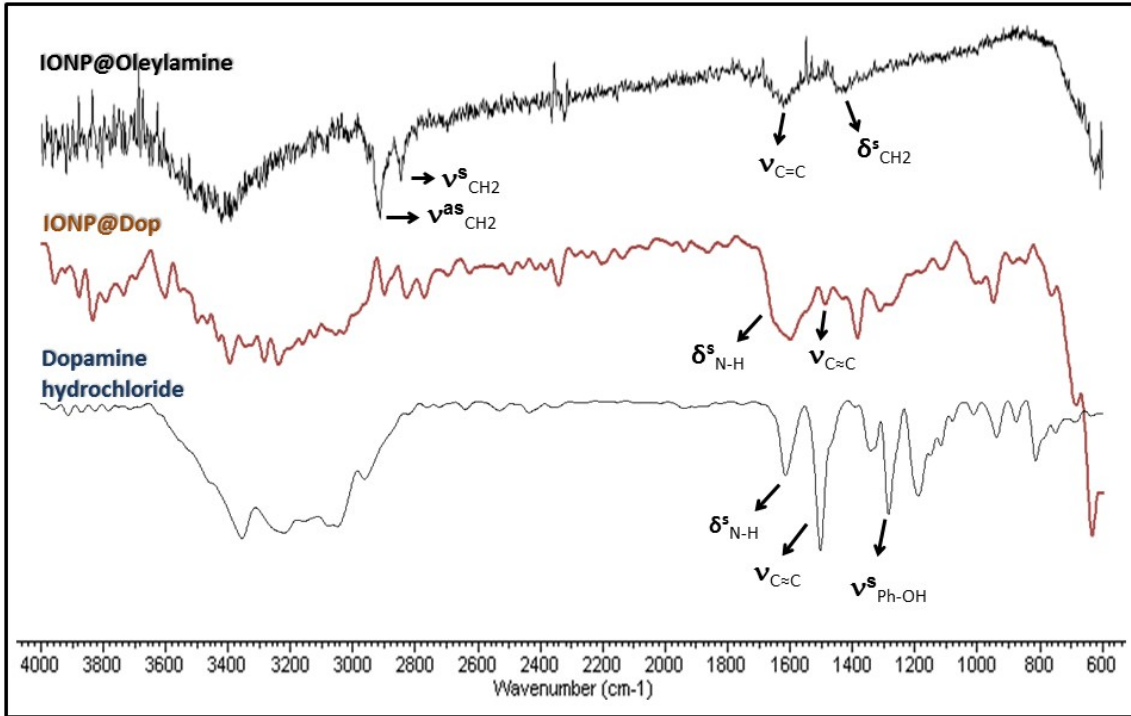

Magnetic susceptibility of IONP@Dop

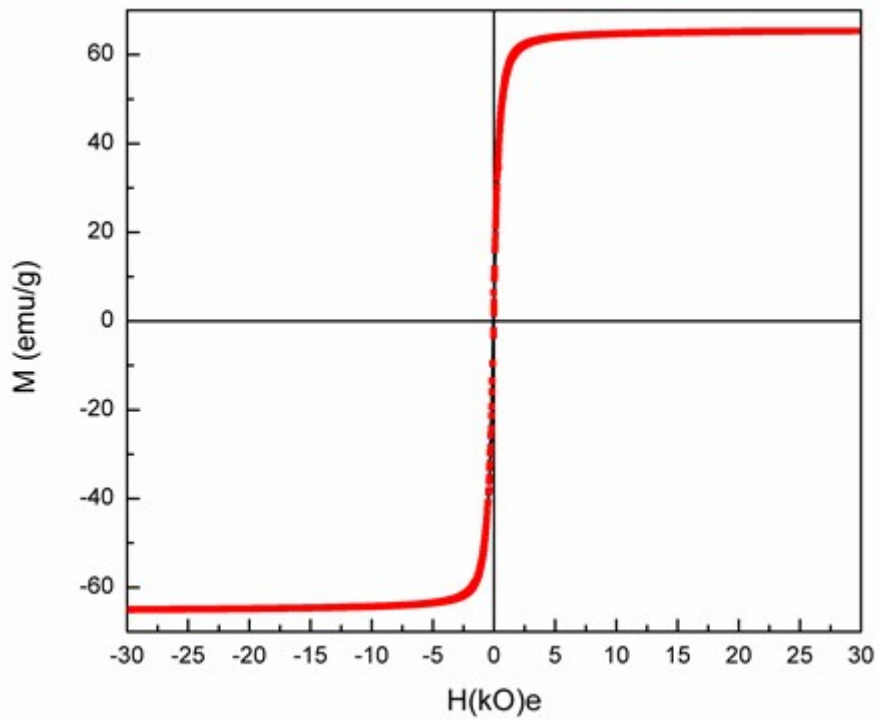

### DRX of IONP@dop

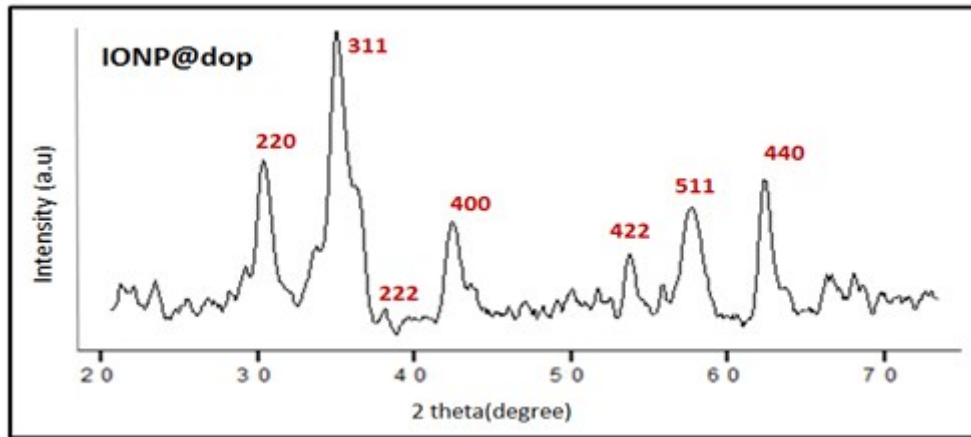

### ESI 3: Vertical assembly of Sulf-FLG@IONP-Dop on gold surface

The gold substrates modified with a monolayer of cystamine were introduced in a inclined conical bottom plastic centrifugal tube containing 10 mL of pure methanol. A commercial permanent magnet (NIB Sintered 1.2 T) was located on the bottom of the tube in a disposition parallel to the plane of the gold substrate (See figure below).

Once set the previously described system, 100  $\mu$ L of dispersion of Sulf-FLG@IONP-Dop were dropped into the methanol containing tube. Under such conditions the Sulf-FLG@IONP-Dop material was observed to deposit on the gold substrate in about an hour. At that time the methanol inside the tube was removed until the top of the square gold substrate touched the air/liquid interface (marked with green line in bellow pictures). In such conditions EDC (1-ethyl-3-(3-dimethylaminopropyl)carbodiimide hydrochloride)/N-hydroxosuccinimide (50 mg/100 mg) were added to the solution and the recipient was opened to allow the spontaneous evaporation of methanol until the bottom the substrate was observed above the meniscus of the solvent (red lines in the bellow pictures). Under such conditions the magnet was retired and the modified substrate was introduced into an opened recipient containing methanol (15 mL). The system was submitted to gently hand shake for removing all the molecular contaminants. The solvent was removed and the previous procedure was repeated two more times. The substrate was finally dried at room temperature in vacuum.

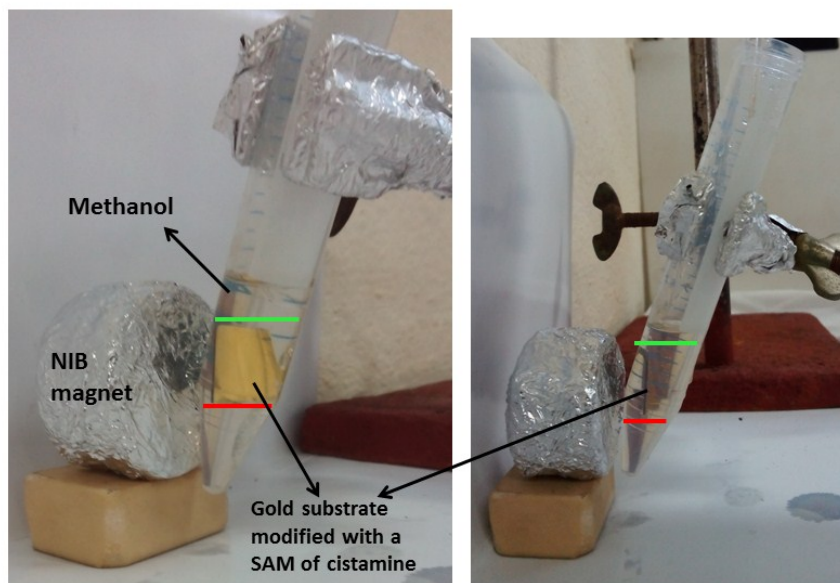

**ESI 4: SEM micrographs and EDX elemental analysis of Au-v- Sulf-FLG@IONP-Dop  
(measured after 1 month of assembled)**

**Au-v- Sulf-FLG@IONP-Dop (measured after 1 month of assembled)**

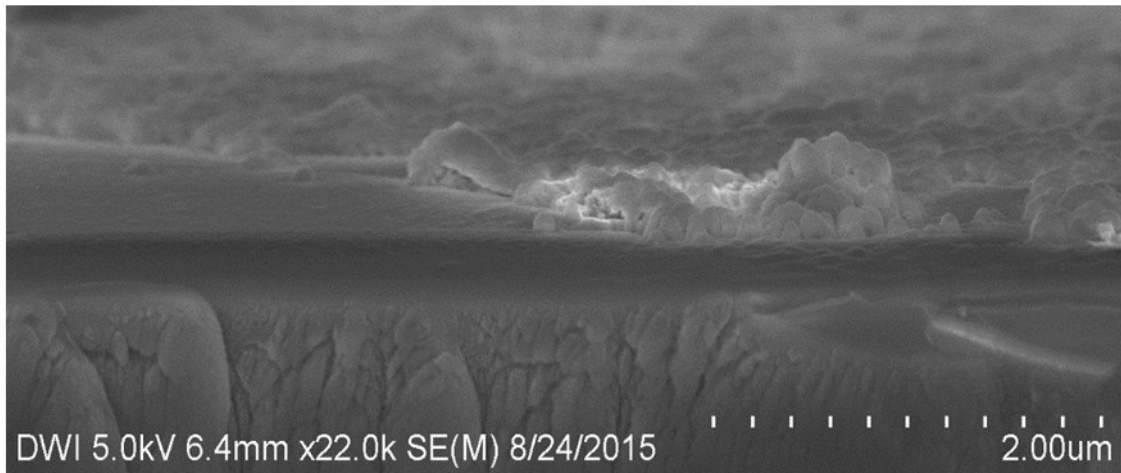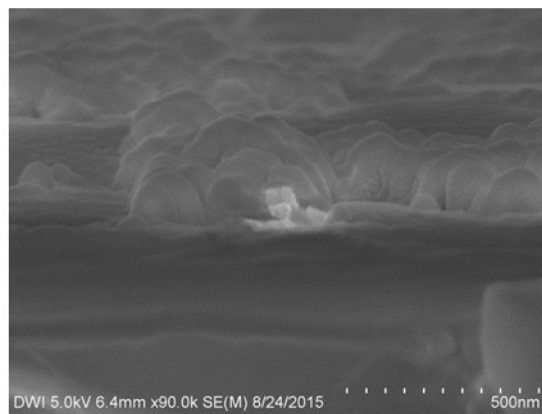

EDX elemental analyses of Au-v-SulfFLG@IONP-Dop

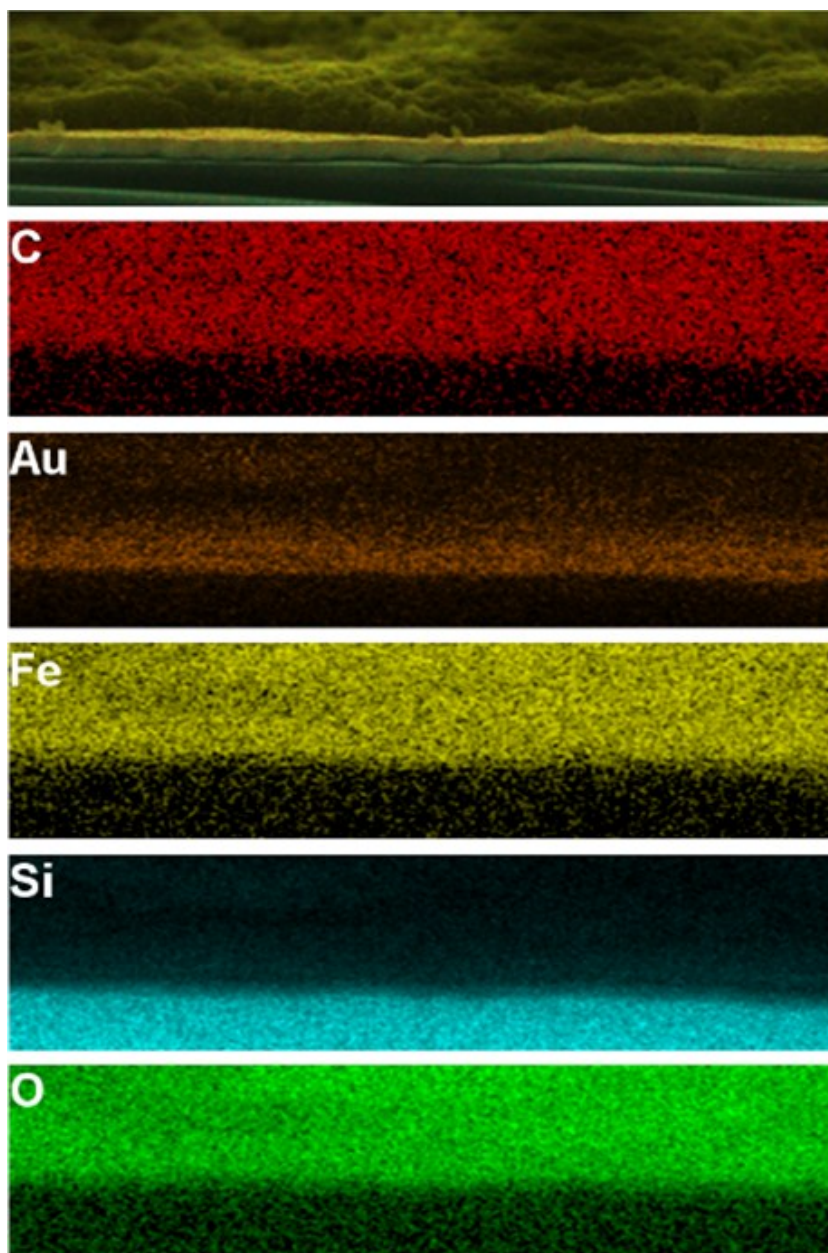

**ESI 5: System employed for measuring the electrochemical properties of Au\_v\_Sulf-FLG@IONP-Dop.**

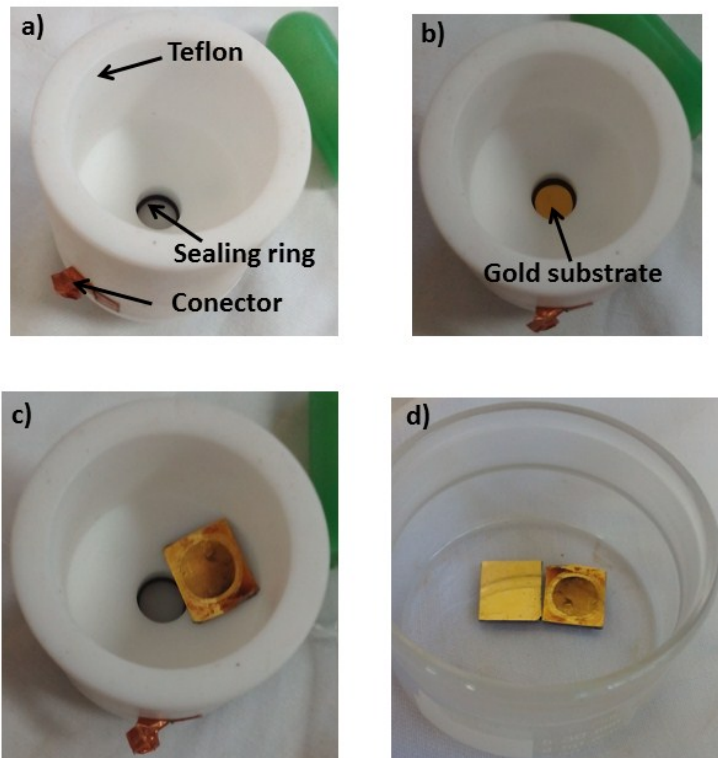

a) Picture of the Teflon cell. b) A gold substrate located in the bottom of the cell. c) A gold substrate modified with vertically aligned Sulf-FLG@IONP-Dop used during the electrochemical experiment. d) A clean gold substrate and a gold substrate modified with vertically aligned Sulf-FLG@IONP-Dop after their use in the electrochemical experiments.

**References**

1. S. Stankovich, R. D. Piner, S. T. Nguyen and Ruoff R. S., *Carb*, **2006**, *44*, 3342–3347.
